# Supplementary material for: Impact of Sustained Transforming Growth Factor-β Receptor Inhibition on Chromatin Accessibility and Gene Expression in Cultured Human Endometrial MSC
Source: PubMed Central journal article supplement (PMC7490520; doi:10.3389/fcell.2020.567610), 2020-09-01
Supplement: Data_Sheet_1.pdf [file Data_Sheet_1.pdf]

*Supplementary Material*

**Impact of Sustained Transforming Growth Factor- $\beta$  Receptor Inhibition on Chromatin Accessibility and Gene Expression in Cultured Human Endometrial MSC**

**Raffaella Lucciola<sup>1,2,3</sup>, Pavle Vrljicak<sup>3,4</sup>, Shanti Gurung<sup>1,5</sup>, Caitlin Filby<sup>1,2</sup>, Saeedeh Darzi<sup>1,2</sup>, Joanne Muter<sup>3,4</sup>, Sascha Ott<sup>3,4</sup>, Jan J. Brosens<sup>3,4</sup> and Caroline E. Gargett<sup>1,2\*</sup>**

**\* Correspondence:**

Caroline E. Gargett

caroline.gargett@hudson.org.au

Table S1 Regulation of pathways preventing cellular senescence in A83-01-treated eMSC

|                             | Category         | Term                                               | Genes                                                     | Fold Enrichment* |
|-----------------------------|------------------|----------------------------------------------------|-----------------------------------------------------------|------------------|
| <b>Up-regulated genes</b>   | GOTERM_MF_DIRECT | peroxidase activity                                | CYGB, GPX3, PTGS2                                         | 3.74             |
|                             | GOTERM_BP_DIRECT | response to oxidative stress                       | CYGB, GPX3, PTGS2, SCARA3, APOE, DUSP1                    | 1.46             |
|                             | GOTERM_BP_DIRECT | cellular oxidant detoxification                    | CYGB, GPX3, PTGS2, APOE                                   | 1.53             |
| <b>Down-regulated genes</b> | KEGG_PATHWAY     | p53 signaling pathway                              | CDK6, CCND2, THBS1, ATM, TP53I3, IGF1, CDKN1A, RPRM, PTEN | 3.82             |
|                             | BIOCARTA         | cyclins and cell cycle regulation                  | CDK6, CCND2, CDKN2B, CDKN1A                               | 4.41             |
|                             | BBID             | cyclin-CDK complexes                               | CDK6, CDKN2B, CDKN1A                                      | 5.97             |
|                             | GOTERM_CC_DIRECT | cyclin-dependent protein kinase holoenzyme complex | CDK6, CCND2, CDKN1A                                       | 6.04             |
|                             | BIOCARTA         | Cell Cycle: G1/S Check Point                       | CDK6, ATM, CDKN2B, CDKN1A                                 | 3.67             |
|                             | KEGG_PATHWAY     | cell cycle                                         | CDK6, CCND2, ATM, CDKN2B, CDKN1A                          | 1.15             |

\* Fold enrichment represents enrichment of the indicated GO term in A83-01 treated versus untreated samples.

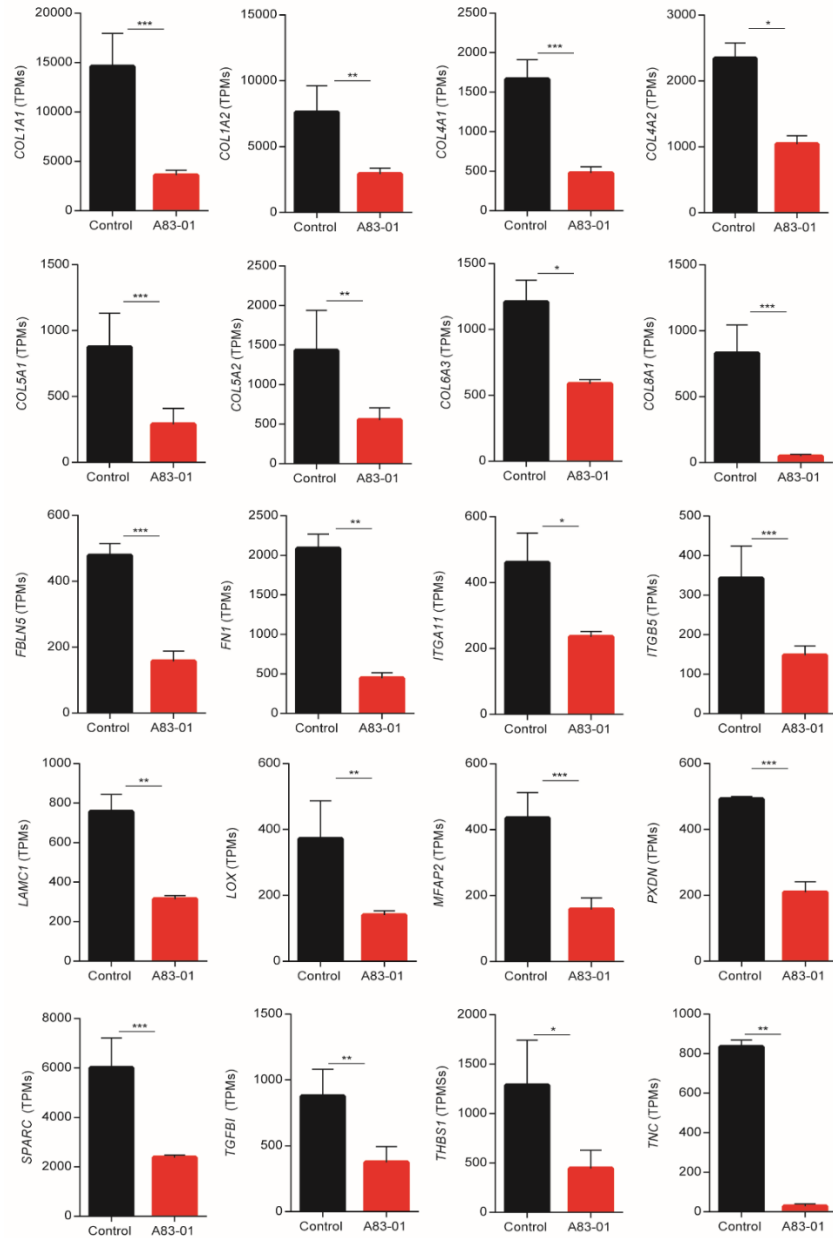

**Figure S1. ECM genes down-regulated in response to A83-01 treatment.** Graphs showing changes in level of gene expression of the top 16 most abundant ECM genes negatively regulated by TGF $\beta$ -R inhibition, represented as changes in TPMs. Data represent mean  $\pm$  SEM; Y-axis shows TPMs; \* indicates  $q < 0.05$ , \*\*  $q < 0.01$  and \*\*\*  $q < 0.001$ .

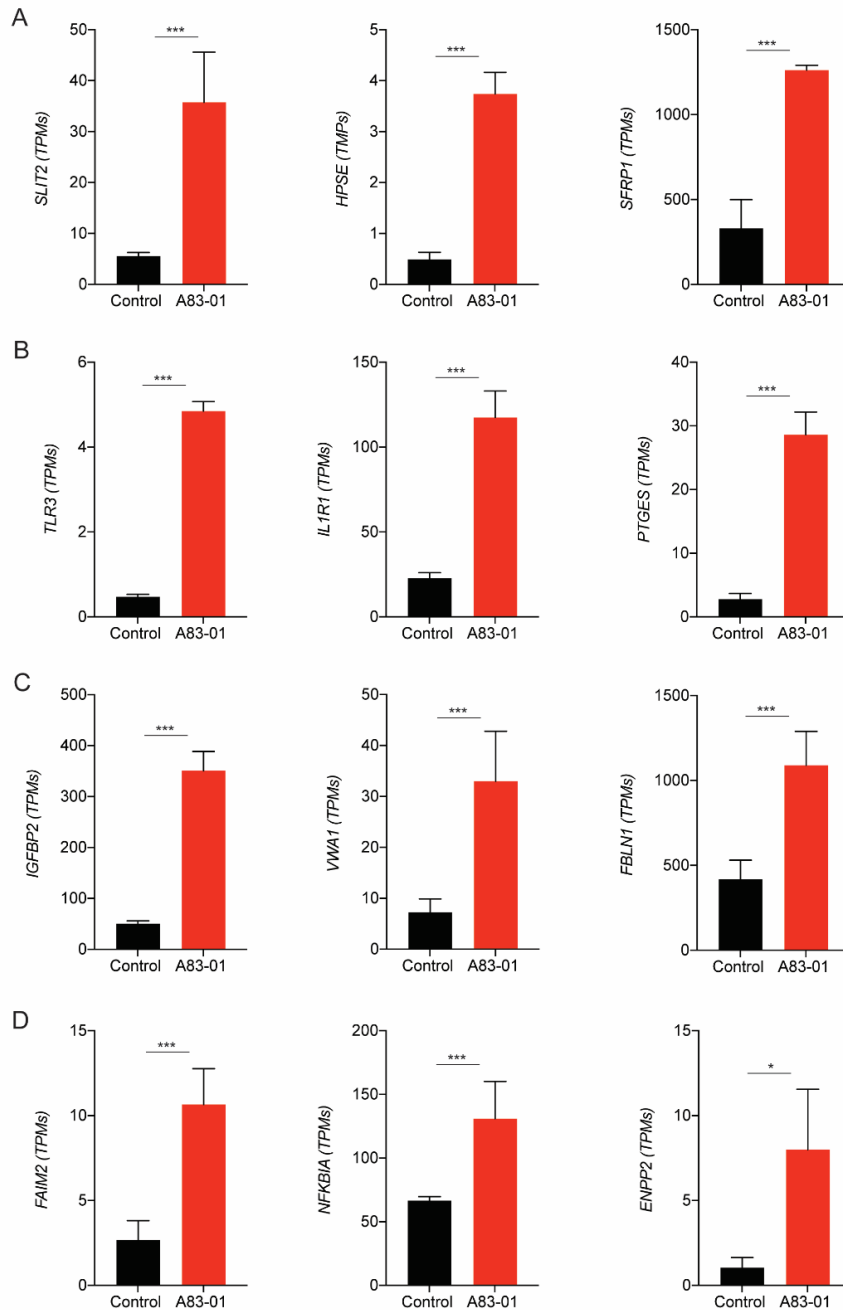

**Figure S2. Examples of angiogenic (A) anti-inflammatory, (B) immunomodulatory (C) antifibrotic and (D) antiapoptotic genes up-regulated in response to A83-01 treatment.** Graph show changes in gene expression level (TPMs) of positively regulated genes by TGF $\beta$ -R inhibition. Data represent mean  $\pm$  SEM; Y-axis shows TPMs; \* indicates  $q < 0.05$ , \*\*  $q < 0.01$  and \*\*\*  $q < 0.001$ .

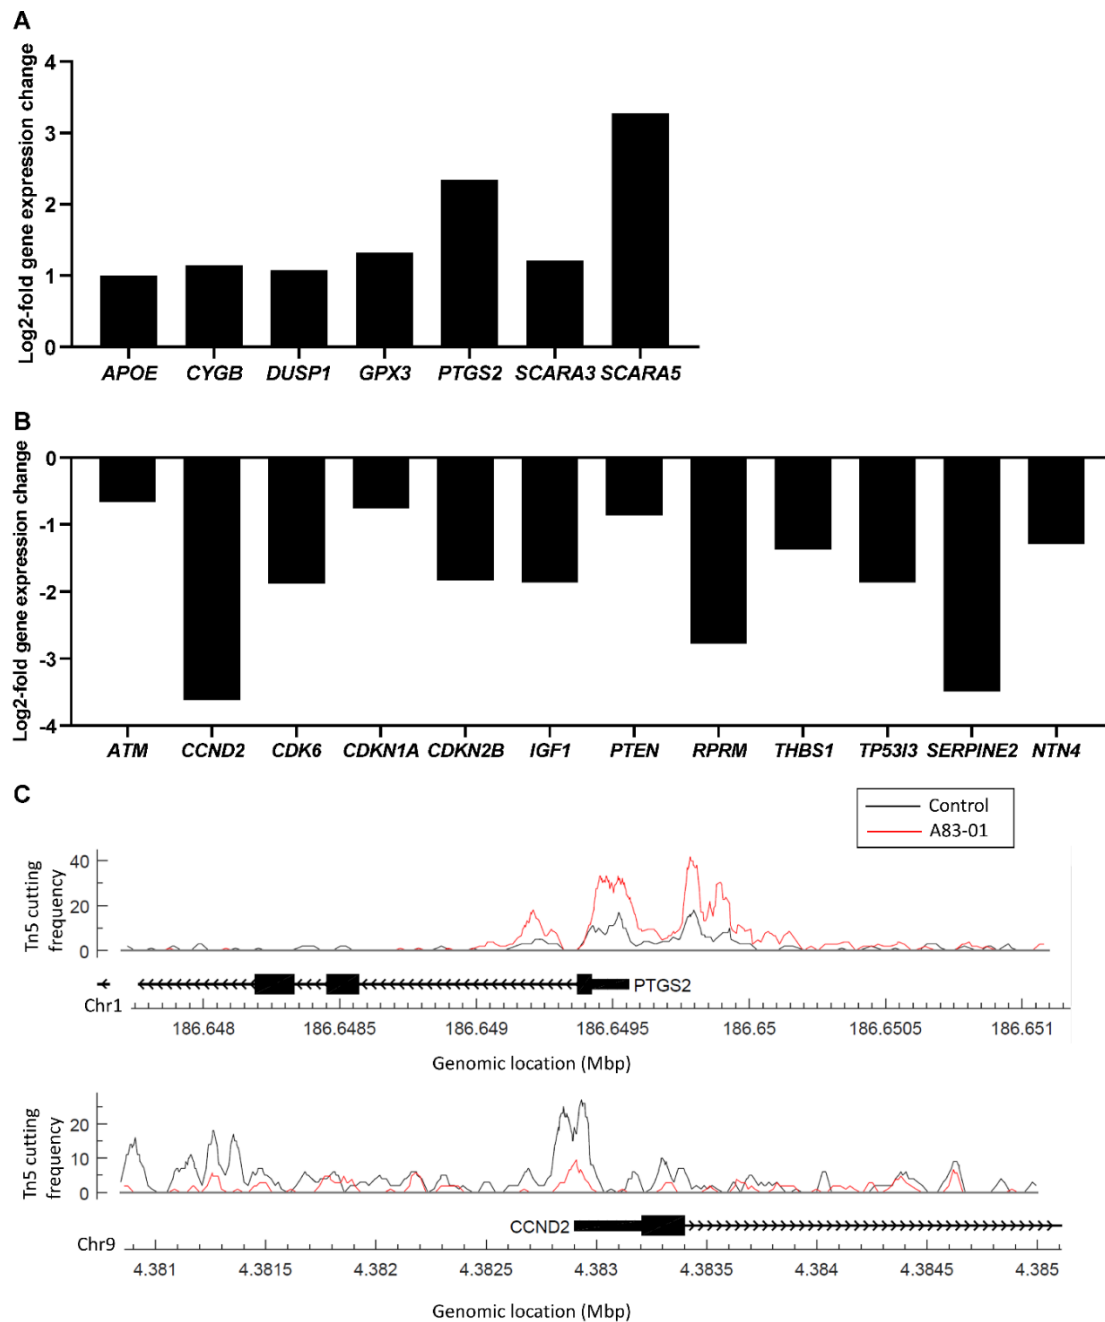

**Figure S3. Regulation of senescence related genes.** A83-01 prevents eMSC senescence through **A)** induction of genes implicated in preventing oxidative damage and **B)** inhibition of cellular senescence-related genes. **C)** ATAC peak showing opening and closing of the chromatin accessibility downstream of the promoter region of *PTGS2* and *CCND2*, respectively. Black and red traces represent untreated and A83-01-treated eMSC. The X-axis shows the genomic location of the ATAC-seq peaks and genes.

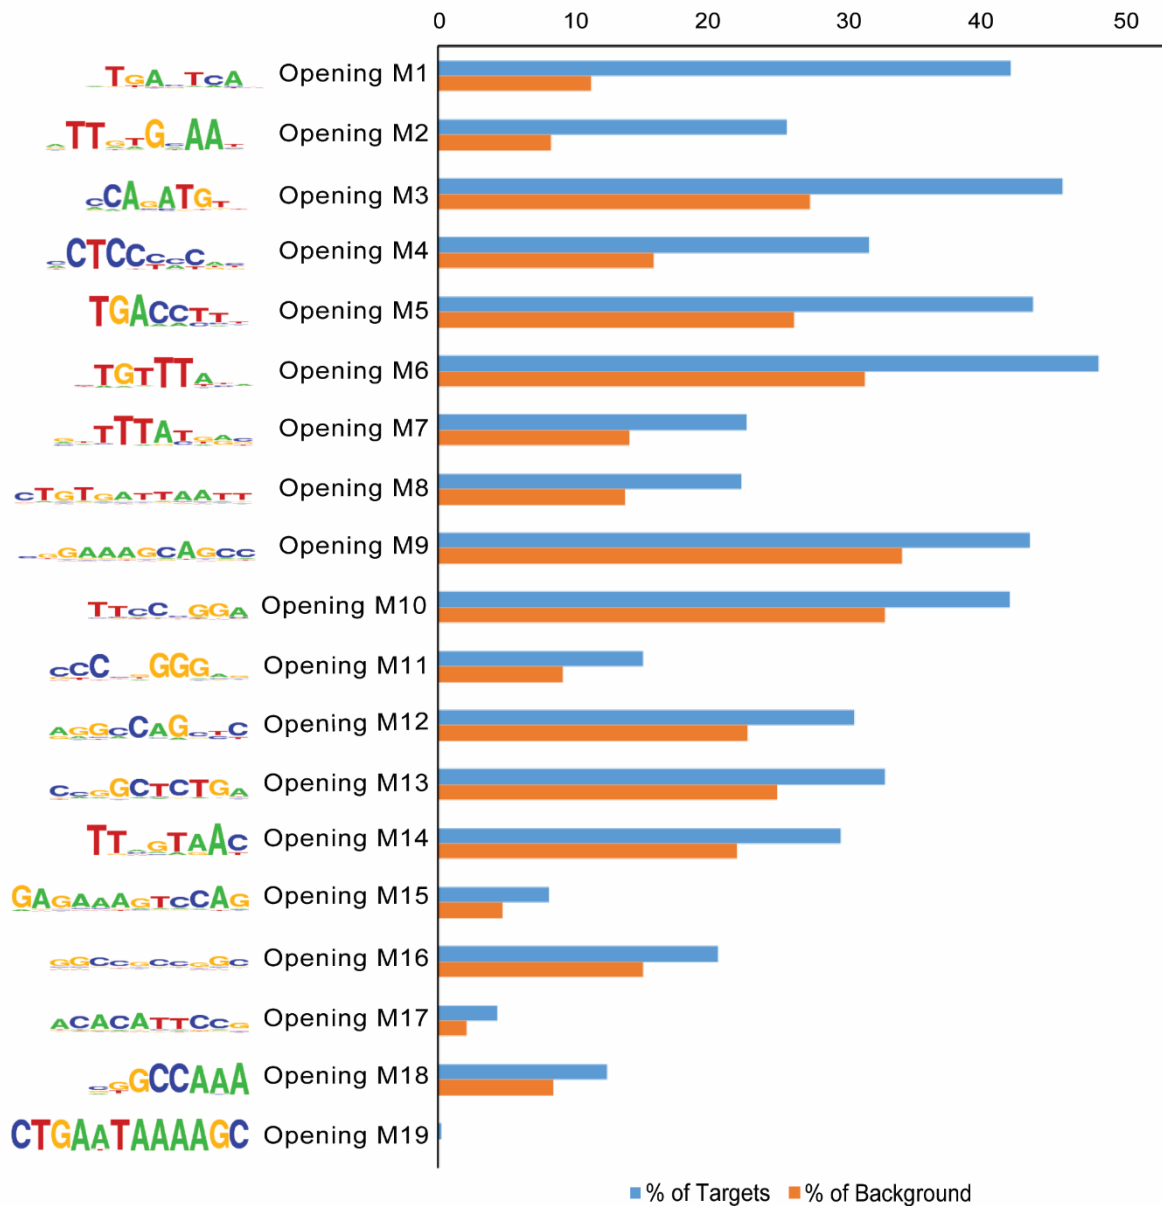

**Figure S4. Enrichment of TF binding motifs in opening genomic regions.** Total of 19 TF binding motifs enriched in the opening ATAC-seq peaks. The frequency (%) of peaks (blue bars) containing a given motif is shown relative to genomic regions randomly selected from the genome (orange bars) ( $\pm 50$  kb from TSS, matching size, and GC/CpG content).

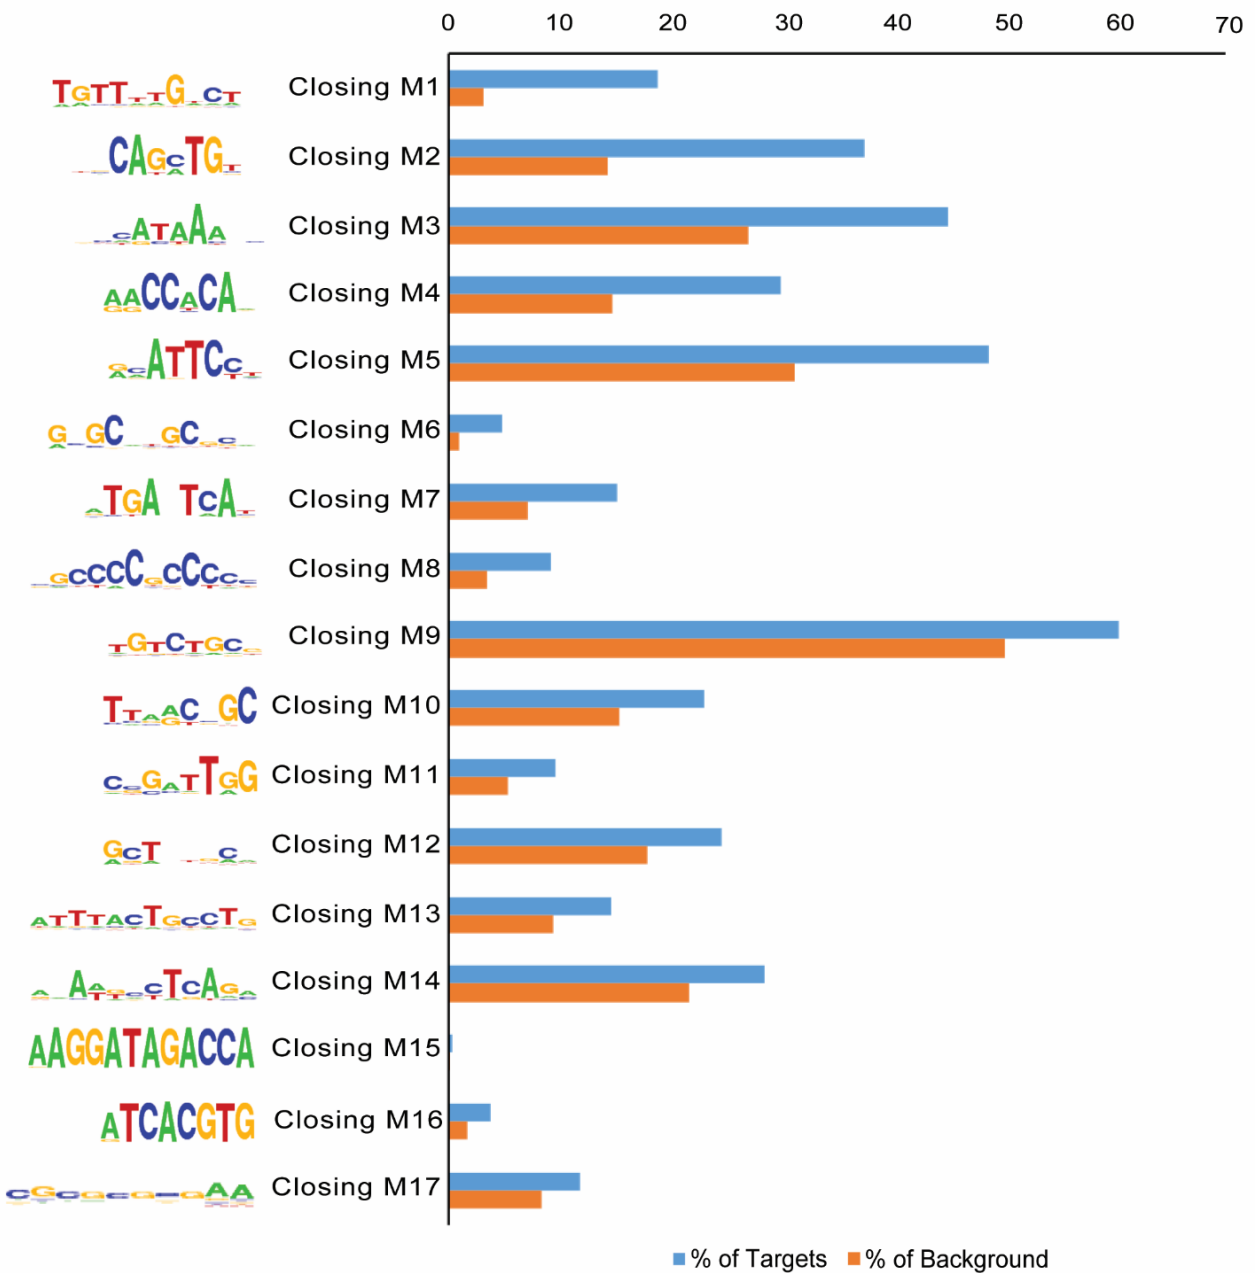

**Figure S5. Depletion of TF binding motifs in closing genomic regions.** Total of 17 TF binding motifs enriched in the closing ATAC-seq peaks. The frequency (%) of peaks (blue bars) containing a given motif is shown relative to genomic regions randomly selected from the genome (orange bars) ( $\pm 50$  Kb from TSS, matching size, and GC/CpG content).
